# Supplementary material
Source: Research Square preprint supplement (doi:10.21203/rs.3.rs-8927466/v1)
Supplement: Supplementary file 1 [file 0bd8bc12b3b2f29352f5ebdd.docx]

#### **Supplementary Table 1.** Breakdown of exclusion criteria applied to the study population.

| **Exclusion Criterion** | **Number of Patients Excluded** |
| --- | --- |
| High inflammation (CRP > 10 mg/L) | 369 |
| End-stage renal disease (eGFR < 15 mL/min/1.73 m²) | 35 |
| Diagnosis of acute cardiovascular event | 8 |
| Diagnosis of active infection | 4 |
| Diagnosis of severe organ failure | 4 |
| Diagnosis of pregnancy | 0 |
| Total Exclusions | 395* |

**Note:***Patients could meet more than one exclusion criterion simultaneously.

**Abbreviations:** CRP, C-reactive protein; eGFR, estimated glomerular filtration rate.

**Supplementary Table 2.** Methodological discordance: Friedewald vs. Sampson-NIH Equation.

| **Metric** | **Value** |
| --- | --- |
| Mean Friedewald LDL-C | 126.5 mg/dL |
| Mean Sampson-NIH LDL-C | 72.5 mg/dL |
| Mean Difference (Bias) | -54.0 mg/dL |
| P-value (Paired t-test) | < 0.001 |

**Note:** Analysis performed in patients with triglycerides 150–400 mg/dL.

**Suppplementary Table 3.** Comparison of baseline characteristics between patients with missing vs. observed CRP data.

| **Characteristic** | **CRP Available (n=2,035)** | **CRP Missing (n=1,307)** | **P-value** |
| --- | --- | --- | --- |
| Age, years (Median [IQR]) | 58.0 [45.0–68.0] | 60.0 [49.0–70.0] | < 0.001 |
| eGFR, mL/min/1.73 m² (Median [IQR]) | 90.0 [76.0–102.0] | 84.0 [65.0–98.0] | < 0.001 |
| HbA1c, % (Median [IQR]) | 5.7 [5.3–6.3] | 5.8 [5.4–6.6] | < 0.001 |
| ASCVD Prevalence, n (%) | 45 (2.2%) | 335 (25.6%) | < 0.001 |
| Calculated LDL-C, mg/dL | 121.6 [89.0–141.0] | 117.0 [91.2–141.2] | < 0.001 |
| Remnant Cholesterol, mg/dL | 14.0 [9.0–20.0] | 13.0 [8.0–19.0] | 0.577 |
| Triglycerides, mg/dL | 121.0 [88.0–170.0] | 123.5 [90.0–179.0] | 0.095 |
| HDL-C, mg/dL | 55.0 [46.0–65.0] | 53.0 [45.0–61.0] | < 0.001 |

**Note:** P-values derived from Mann-Whitney U test (continuous) and Chi-square test (categorical).

**Abbreviations:** IQR, interquartile range; CRP, C-reactive protein; eGFR, estimated glomerular filtration rate; HbA1c, hemoglobin A1c; ASCVD, atherosclerotic cardiovascular disease; LDL-C, low-density lipoprotein cholesterol; RC, remnant cholesterol.

**Supplementary Table 4.** Assessment of Multicollinearity (VIF Diagnostics).

| **Predictor Variable** | **Variance Inflation Factor (VIF)** | **Interpretation** |
| --- | --- | --- |
| Age | 1.15 | Excellent |
| Sampson LDL-C | 1.48 | Good |
| Remnant Cholesterol | 1.56 | Good |
| eGFR | 1.15 | Excellent |
| HbA1c | 1.10 | Excellent |
| LDL-C x RC Interaction | 5.98 | Acceptable* |

**Note:** Interaction terms naturally exhibit higher VIFs, but values well below the conventional diagnostic threshold of 10 indicate that multicollinearity is not a significant concern.

**Supplementary** **Table 5**. Persistence of the LDL-C x RC Interaction across Datasets (Sampson-NIH Sensitivity Analysis).

| **Variable** | **Odds Ratio (95% CI)** | **P-Value** | **Interpretation** | **Variable** |
| --- | --- | --- | --- | --- |
| Age | 2.42 [1.90-2.85] | < 0.001 | Significant | Age |
| Sex (Male) | 2.35 [1.95-3.05] | < 0.001 | Significant | Sex (Male) |
| eGFR | 1.31 [1.05-1.50] | 0.010 | Significant | eGFR |
| Sampson-NIH LDL-C | 0.75 [0.62-0.91] | 0.004 | Suppressor Effect | Sampson-NIH LDL-C |
| Remnant Cholesterol | 1.84 [1.32-2.58] | < 0.001 | Robustly Significant | Remnant Cholesterol |
| Sampson-LDL x RC Interaction | 0.74 [0.61-0.90] | 0.003 | Interaction Persists | Sampson-LDL x RC Interaction |

**Note:** This multivariable logistic regression model (Model 4 + INT) utilizes the Sampson-NIH equation across all m=50 MICE datasets. The persistence of the inverse association for LDL-C and the highly significant interaction term (p=0.003) confirm that the suppressor effect is not a calculation artifact of the Friedewald formula. (In contrast, a complete-case analysis without imputation yielded an attenuated interaction [p=0.80], highlighting the susceptibility of complete-case approaches to selection bias in this tertiary cohort).

**Supplementary** **Table 6.** Sensitivity Analysis without Imputation Group.

| **Variable** | **OR (95% CI)** | **P-Value** | **Interpretation** |
| --- | --- | --- | --- |
| Remnant Cholesterol | 1.47 [1.14–1.88] | 0.002 | Robustly Significant |
| Calculated LDL-C | 0.78 [0.61–0.99] | 0.046 | Suppressor Effect Persists |
| Age | 3.48 [2.54–4.76] | < 0.001 | Significant |
| Sex (Male) | 1.89 [1.28–2.78] | 0.001 | Significant |
| eGFR | 1.39 [1.07–1.81] | 0.013 | Significant |

**Note:** Multivariable logistic regression model trained on complete-case data without MICE imputation.

**Supplementary Table 7.** Characteristics of Patients with Negative Remnant Cholesterol.

| **Parameter** | **Mean ± SD** | **Clinical Interpretation** |
| --- | --- | --- |
| Triglycerides | 72.6 ± 33.3 mg/dL | Very Low |
| HDL-C | 72.2 ± 15.2 mg/dL | High |
| Direct LDL-C | 103.5 ± 30.8 mg/dL | - |
| Remnant Cholesterol | -2.8 ± 2.7 mg/dL | Negative Artifact |

**Note:** Negative RC values were observed exclusively in patients with a low-TG / high-HDL phenotype.

**Supplementary Table 8.** Model Fit Statistics and Information Criteria.

| **Model** | **AIC** | **BIC** | **Pseudo R²** |
| --- | --- | --- | --- |
| Model 1 (Base) | 2183.1 | 2213.7 | 0.082 |
| Model 2 (+LDL) | 2180.1 | 2216.8 | 0.084 |
| Model 3 (+RC) | 2183.1 | 2219.8 | 0.083 |
| Model 4 (Comp) | 2174.6 | 2223.5 | 0.088 |
| Model 4 + INT | 2156.2 | 2211.2 | 0.097 |

**Note:** The significant drop in AIC for "Model 4 + INT" confirms improved model fit.
