# Supplementary material
Source: Research Square preprint supplement (doi:10.21203/rs.3.rs-8927466/v1)
Supplement: Supplementary file 2 [file 5eef86840659e1300cfcc2bb.docx]

**Tables**

**Table 1.** Baseline demographic and clinical characteristics of the study cohort.

| **Characteristic** | **Value (n=3,342)** | **Missing n (%)** |
| --- | --- | --- |
| **Demographics** |  |  |
| Age, years (mean ± SD) | 56.7 ± 16.8 | 0 (0.0%) |
| Sex (Female), n (%) | 1,941 (58.1%) | 0 (0.0%) |
| Sex (Male), n (%) | 1,401 (41.9%) | 0 (0.0%) |
| **Lipid Profile (Median [IQR])** |  |  |
| Total Cholesterol, mg/dL | 203.0 [172.0–235.0] | 2 (0.1%) |
| Triglycerides, mg/dL | 122.0 [89.0–175.0] | 3 (0.1%) |
| HDL-C, mg/dL | 54.0 [46.0–64.0] | 3 (0.1%) |
| Calculated LDL-C, mg/dL | 119.6 [95.0–145.4] | 90 (2.7%) |
| Direct LDL-C, mg/dL | 133.0 [110.0–158.0] | 0 (0.0%) |
| Non-HDL-C, mg/dL | 148.0 [121.0–176.0] | 3 (0.1%) |
| Remnant Cholesterol (RC), mg/dL | 14.0 [9.0–19.0] | 3 (0.1%) |
| **Metabolic & Renal** |  |  |
| HbA1c, % and mmol/mol (mean ± SD) | 6.1 ± 1.3 (43 ± 14) | 19 (0.6%) |
| CRP, mg/L (median [IQR]) | 2.2 [1.0–4.3] | 1,307 (39.1%) |
| eGFR, mL/min/1.73 m² (mean ± SD) | 84.6 ± 24.7 | 4 (0.1%) |
| **Clinical Categories, n (%)** |  |  |
| Hypertension (Yes) | 377 (11.3%) | — |
| Atherogenic Dyslipidemia (Present) | 314 (9.4%) | — |
| **CKD Stage** |  |  |
| G1 | 1,561 (46.7%) | — |
| G2 | 1,237 (37.0%) | — |
| G3a–G3b (Moderate) | 465 (13.9%) | — |
| G4 (Severe) | 75 (2.2%) | — |

**Note:** Data are presented as mean ± SD, median [IQR], or n (%). *Abbreviations:* SD, standard deviation; IQR, interquartile range; HDL-C, high-density lipoprotein cholesterol; LDL-C, low-density lipoprotein cholesterol; Non-HDL-C, non-high-density lipoprotein cholesterol; HbA1c, glycated hemoglobin; CRP, C-reactive protein; eGFR, estimated glomerular filtration rate; CKD, chronic kidney disease.

**Table 2**. Comparison of baseline characteristics according to Atherogenic Dyslipidemia (AD) status.

| **Characteristic** | **AD Present** | **AD Absent** | **Adjusted P-value*** |
| --- | --- | --- | --- |
| **Lipid Profile (Median [IQR])** | **(n = 314)** | **(n = 3,028)** |  |
| Calculated LDL-C, mg/dL | 99.7 [77.6–121.4] | 121.6 [97.2–147.8] | < 0.001 |
| Direct LDL-C, mg/dL | 127.0 [106.2–145.0] | 134.0 [110.0–160.0] | < 0.001 |
| Remnant Cholesterol (RC), mg/dL | 18.0 [13.2–23.8] | 13.0 [8.0–19.0] | < 0.001 |
| Non-HDL-C, mg/dL | 146.0 [123.0–168.8] | 148.0 [121.0–178.0] | 0.231 |
| **Cardiometabolic & Renal (Median [IQR])** |  |  |  |
| HbA1c, %, mmol/mol | 6.2 [5.6–7.3] (44 [38–56]) | 5.7 [5.4–6.3] (39 [36–45]) | < 0.001 |
| CRP, mg/L | 3.3 [1.9–5.6] | 2.1 [1.0–4.1] | < 0.001 |
| eGFR, mL/min/1.73 m² | 87.0 [58.2–99.0] | 88.0 [70.0–101.0] | 0.080 |
| **Categorical Risk Factors, n (%)** |  |  | **Overall P-value**** |
| **Calculated LDL-C Strata** | **(n = 284)** | **(n = 2,968)** | **< 0.001** |
| <70 mg/dL | 51 (18.0%) | 210 (7.1%) |  |
| 70–99 mg/dL | 92 (32.4%) | 616 (20.8%) |  |
| ≥100 mg/dL | 141 (49.6%) | 2,142 (72.2%) |  |
| **Chronic Kidney Disease Stage** | **(n = 314)** | **(n = 3,024)** | **< 0.001** |
| G1 (eGFR ≥ 90) | 146 (46.5%) | 1,415 (46.8%) |  |
| G2 (eGFR 60-89) | 87 (27.7%) | 1,150 (38.0%) |  |
| G3a (eGFR 45-59) | 38 (12.1%) | 264 (8.7%) |  |
| G3b (eGFR 30-44) | 24 (7.6%) | 139 (4.6%) |  |
| G4 (eGFR 15-29) | 19 (6.1%) | 56 (1.9%) |  |
| **CRP Strata** | **(n = 166)** | **(n = 1,869)** | **< 0.001** |
| <1.0 mg/L (Low Risk) | 23 (13.9%) | 492 (26.3%) |  |
| 1.0–3.0 mg/L (Average Risk) | 55 (33.1%) | 705 (37.7%) |  |
| >3.0 mg/L (High Risk) | 88 (53.0%) | 672 (36.0%) |  |

**Note:** Data are presented as median [IQR] or n (%). *Adjusted p-values for continuous variables were calculated using the Mann-Whitney U test followed by the Benjamini-Hochberg false discovery rate (FDR) procedure. **Overall p-values for categorical variables were calculated using the Chi-square test. *Abbreviations:* AD, atherogenic dyslipidemia; IQR, interquartile range; LDL-C, low-density lipoprotein cholesterol; HDL-C, high-density lipoprotein cholesterol; HbA1c, glycated hemoglobin; CRP, C-reactive protein; eGFR, estimated glomerular filtration rate.

**Table 3.** Discriminative accuracy of nested logistic regression models for prevalent ASCVD.

| **Model** | **AUC (95% CI)** | **Brier Score** |
| --- | --- | --- |
| Model 1 (Clinical Base) | 0.715 (0.691–0.739) | 0.0959 |
| Model 2 (+ Calculated LDL-C) | 0.719 (0.695–0.742) | 0.0956 |
| Model 3 (+ Remnant Cholesterol) | 0.717 (0.692–0.740) | 0.0959 |
| Model 4 (Comprehensive) | 0.726 (0.702–0.750) | 0.0954 |
| Model 4 + INT (Interaction) | 0.732 (0.708–0.755) | 0.0944 |

**Abbreviations:** ASCVD, atherosclerotic cardiovascular disease; AUC, area under the receiver operating characteristic curve; CI, confidence interval; INT, interaction term.

**Table 4.** Independent predictors of ASCVD (Pooled Odds Ratios).

| **Variable** | **Model 1** | **Model 2** | **Model 3** | **Model 4** | **Model 4 + INT** | |
| --- | --- | --- | --- | --- | --- | --- |
| Age | 2.30*** | 2.27*** | 2.32*** | 2.33*** | 2.40* |
| Sex (Male) | 2.54*** | 2.43*** | 2.53*** | 2.45*** | 2.32* |
| HbA1c | 1.00 | 0.99 | 0.99 | 0.96 | 0.94 |
| eGFR | 1.25** | 1.26** | 1.25** | 1.30** | 1.33* |
| Calculated LDL-C | — | 0.88* | — | 0.84** | 0.74* |
| Remnant Cholesterol | — | — | 1.06 | 1.09 | 1.94* |
| logCRP | — | — | — | 1.15* | 1.10 |
| Interaction (LDL×RC) | — | — | — | — | 0.74* |

**Note:** All continuous variables were standardized (Z-scores) prior to analysis. In the interaction model (Model 4 + INT), the main effect odds ratios for calculated LDL-C and Remnant Cholesterol represent conditional effects (i.e., the estimated effect of one variable when the other is at its mean value), which explains the shift in magnitude from Model 4. *p < 0.05, **p < 0.01, ***p < 0.001. **Abbreviations:** ASCVD, atherosclerotic cardiovascular disease; HbA1c, glycated hemoglobin; eGFR, estimated glomerular filtration rate; LDL-C, low-density lipoprotein cholesterol; CRP, C-reactive protein; INT, interaction term.

**Table 5.** Reclassification Improvement (NRI & IDI).

| **Comparison** | **cNRI** | **NRI (Events)** | **NRI (Non-Events)** |
| --- | --- | --- | --- |
| Model 3 vs Model 2 | 0.1% | -7.4% | 7.5% |
| Model 4 vs Model 2 | 22.7% | 10.5% | 12.2% |
| Model 4 + INT vs Model 4 | 26.8% | 13.7% | 13.1% |

1. **Abbreviations:** cNRI, continuous net reclassification index; NRI, net reclassification index; IDI, integrated discrimination improvement; INT, interaction term.
